# Supplementary material for: Development of a single-chain, quasi-dimeric zinc-finger nuclease for the selective degradation of mutated human mitochondrial DNA
Source: PubMed Central journal article supplement — Nucleic Acids Res. 2008 May 29;36(12):3926–38. doi: 10.1093/nar/gkn313 (PMC2475635; doi:10.1093/nar/gkn313), 2008-05-29
Supplement: gkn313_6.pdf [file gkn313_6.pdf]

(A)

|                     | % transfection |       |       |
|---------------------|----------------|-------|-------|
|                     | Exp.1          | Exp.2 | Exp.3 |
| mock                | 49.7           | 36.0  | 9.0   |
| F-NARPd-Fok         | 23.0           | 7.0   | 6.9   |
| F-NARPd-Fok-L35-Fok | 15.2           | 5.4   | 9.2   |

(B)

|                   | % transfection |       |       |
|-------------------|----------------|-------|-------|
|                   | Exp.1          | Exp.2 | Exp.3 |
| mock              | 45.7           | 32.4  | 73.4  |
| F-NCR-Fok         | 27.6           | 30.0  | 32.5  |
| F-NCR-Fok-L35-Fok | 16.4           | 20.0  | 15.2  |

Minczuk *et al.* Supplementary Table 1
