# Supplementary figures and images for: Development of a single-chain, quasi-dimeric zinc-finger nuclease for the selective degradation of mutated human mitochondrial DNA
Source: PubMed Central journal article supplement — Nucleic Acids Res. 2008 May 29;36(12):3926–38. doi: 10.1093/nar/gkn313 (PMC2475635; doi:10.1093/nar/gkn313), 2008-05-29

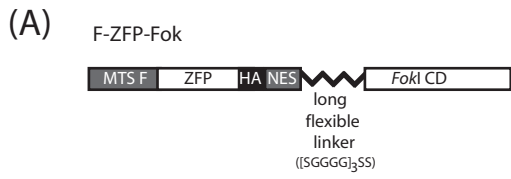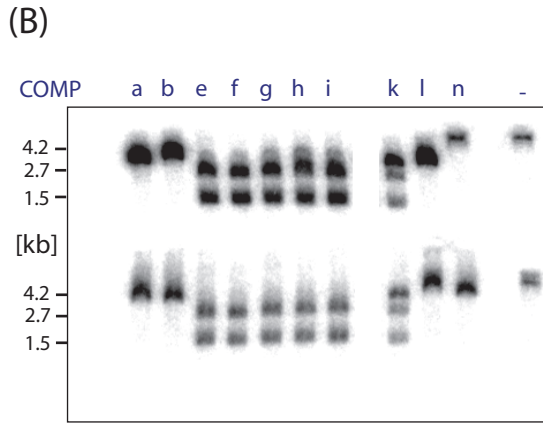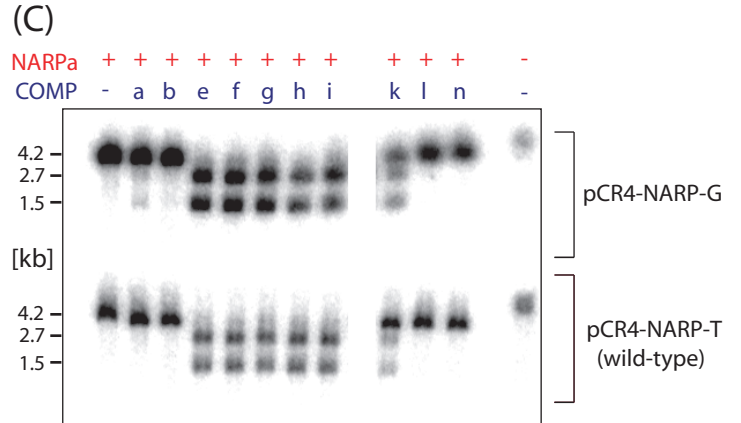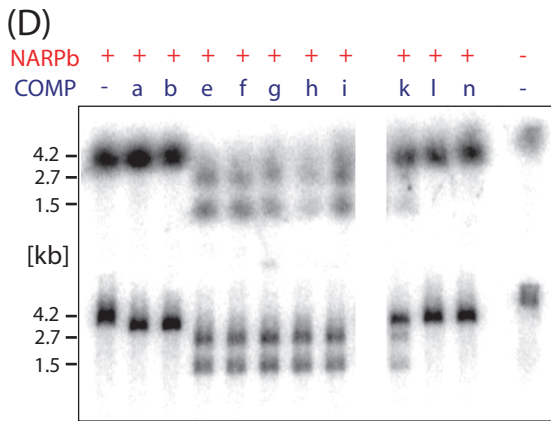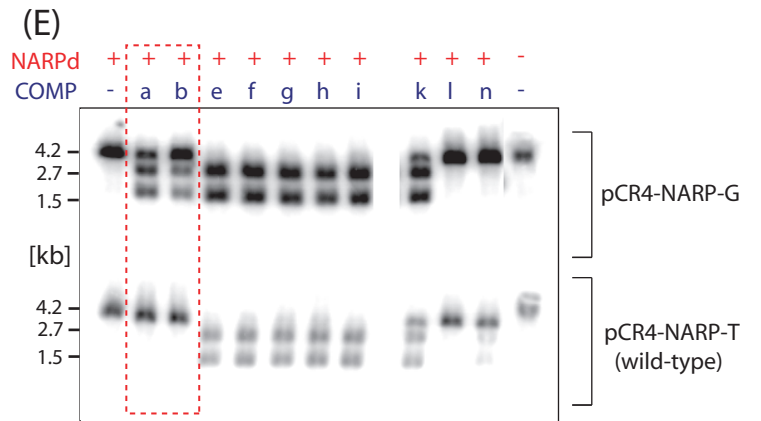

Supplementary Figure 2 Minczuk *et al.*

Supplement: gkn313_2.pdf [file gkn313_2.pdf]

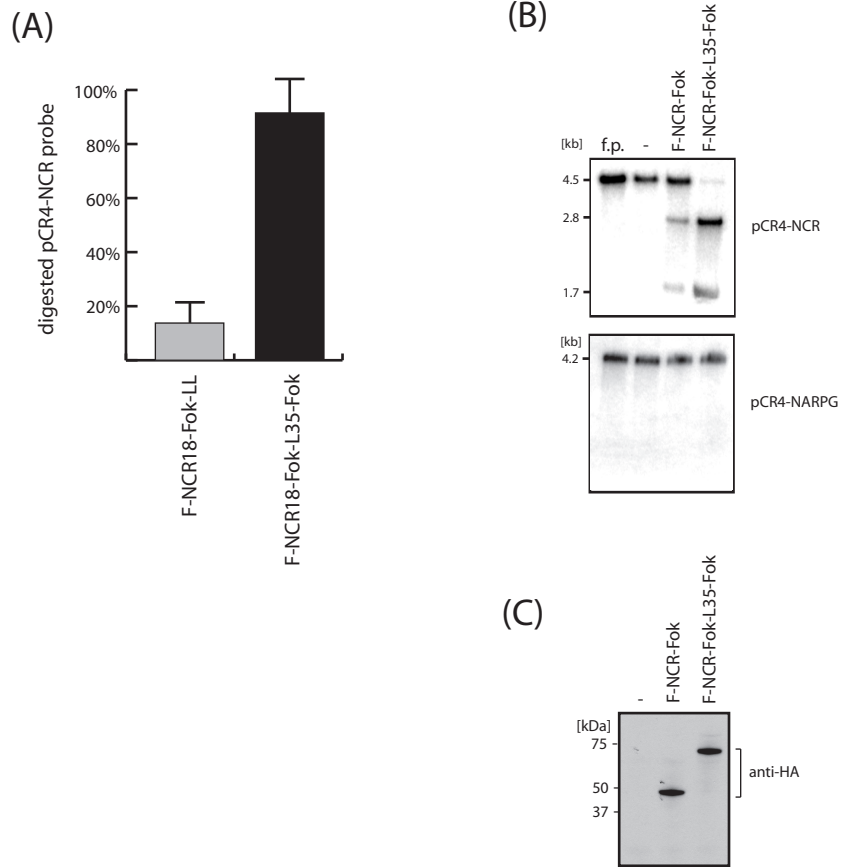

Supplementary Figure 3 Minczuk *et al.*

Supplement: gkn313_3.pdf [file gkn313_3.pdf]

(A)

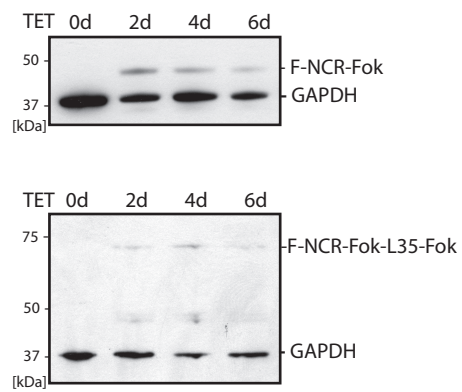

(B)

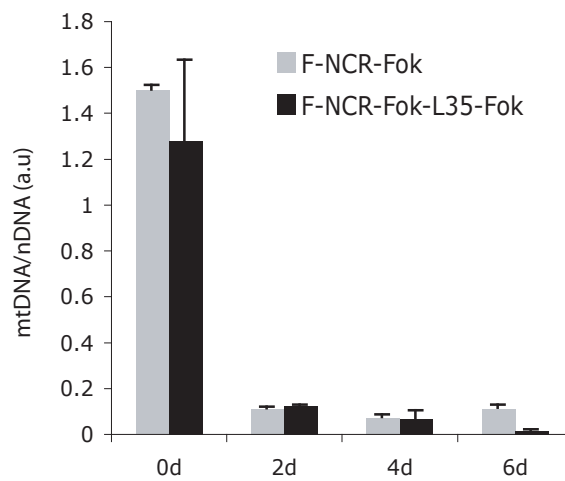

Supplementary Figure 4 Minczuk *et al.*

Supplement: gkn313_4.pdf [file gkn313_4.pdf]

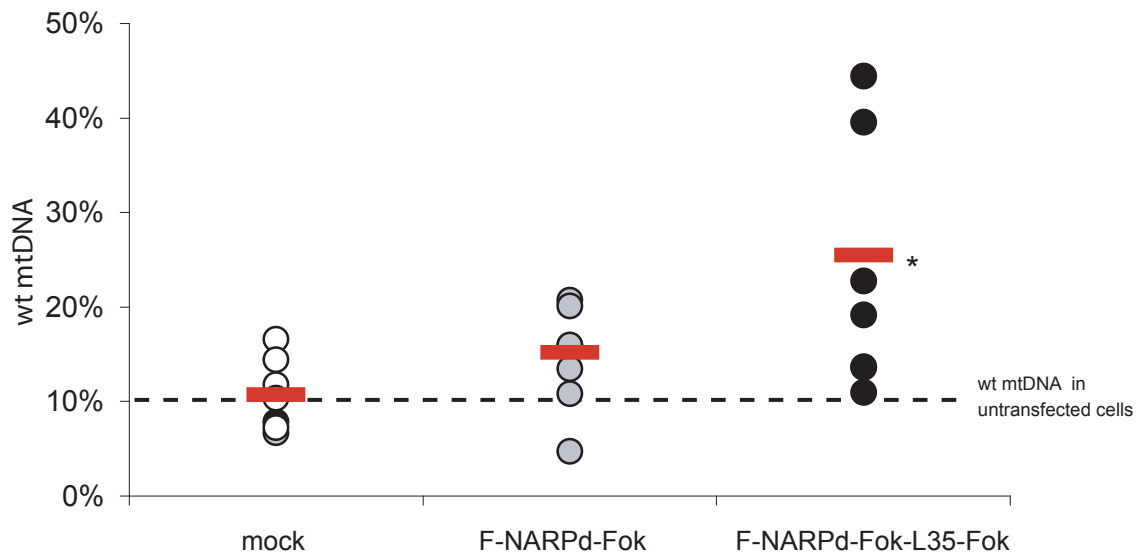

**Supplementary Figure 5 Minczuk et al.**

Supplement: gkn313_5.pdf [file gkn313_5.pdf]
